# Supplementary material for: Photobiomodulation Therapy Prevents Dysgeusia Chemotherapy-Induced in Breast Cancer Women Treated with Doxorubicin Plus Cyclophosphamide: A Triple-Blinded, Randomized, Placebo-Controlled Clinical Trial
Source: Research Square preprint supplement (doi:10.21203/rs.3.rs-687053/v1), 2021-08-20
Supplement: Supplementary file 1 [file 8be19481345396907173f5b6.docx]

ANEXO III –
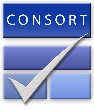
 CONSORT 2010 checklist of information to include when reporting a randomised trial*

| Section/Topic | Item No | Checklist item | Reported on page No |
| --- | --- | --- | --- |
| Title and abstract | | | |
|  | 1a | Identification as a randomised trial in the title | (Page 30) |
| 1b | Structured summary of trial design, methods, results, and conclusions (for specific guidance see CONSORT for abstracts) | Abstract (Page31) |
| Introduction | | | |
| Background and objectives | 2a | Scientific background and explanation of rationale | Page 33 |
| 2b | Specific objectives or hypotheses | Page 33 |
| Methods | | | |
| Trial design | 3a | Description of trial design (such as parallel, factorial) including allocation ratio | Page 33 |
| 3b | Important changes to methods after trial commencement (such as eligibility criteria), with reasons | Page 34 |
| Participants | 4a | Eligibility criteria for participants | Page 34 |
| 4b | Settings and locations where the data were collected | Page 35 |
| Interventions | 5 | The interventions for each group with sufficient details to allow replication, including how and when they were actually administered | Page 35-38 |
| Outcomes | 6a | Completely defined pre-specified primary and secondary outcome measures, including how and when they were assessed | Page 37-38 |
| 6b | Any changes to trial outcomes after the trial commenced, with reasons | Figure 1 |
| Sample size | 7a | How sample size was determined | Page 39 |
| 7b | When applicable, explanation of any interim analyses and stopping guidelines |  |
| Randomisation: |  |  |  |
| Sequence generation | 8a | Method used to generate the random allocation sequence | Page 39 |
| 8b | Type of randomisation; details of any restriction (such as blocking and block size) | Page 39 |
| Allocation concealment mechanism | 9 | Mechanism used to implement the random allocation sequence (such as sequentially numbered containers), describing any steps taken to conceal the sequence until interventions were assigned | Page 39 |
| Implementation | 10 | Who generated the random allocation sequence, who enrolled participants, and who assigned participants to interventions | Page 39 |
| Blinding | 11a | If done, who was blinded after assignment to interventions (for example, participants, care providers, those assessing outcomes) and how | Page 39 |
| 11b | If relevant, description of the similarity of interventions |  |
| Statistical methods | 12a | Statistical methods used to compare groups for primary and secondary outcomes | Page 40 |
| 12b | Methods for additional analyses, such as subgroup analyses and adjusted analyses |  |
| Results | | | |
| Participant flow (a diagram is strongly recommended) | 13a | For each group, the numbers of participants who were randomly assigned, received intended treatment, and were analysed for the primary outcome | Page 40 |
| 13b | For each group, losses and exclusions after randomisation, together with reasons | Figure 1 |
| Recruitment | 14a | Dates defining the periods of recruitment and follow-up | Page 41-45 |
| 14b | Why the trial ended or was stopped | Page 41-45 |
| Baseline data | 15 | A table showing baseline demographic and clinical characteristics for each group | Page 41-45 |
| Numbers analysed | 16 | For each group, number of participants (denominator) included in each analysis and whether the analysis was by original assigned groups |  |
| Outcomes and estimation | 17a | For each primary and secondary outcome, results for each group, and the estimated effect size and its precision (such as 95% confidence interval) | Page 41-45 |
| 17b | For binary outcomes, presentation of both absolute and relative effect sizes is recommended | Page 41-45 |
| Ancillary analyses | 18 | Results of any other analyses performed, including subgroup analyses and adjusted analyses, distinguishing pre-specified from exploratory |  |
| Harms | 19 | All important harms or unintended effects in each group (for specific guidance see CONSORT for harms) |  |
| Discussion | | | |
| Limitations | 20 | Trial limitations, addressing sources of potential bias, imprecision, and, if relevant, multiplicity of analyses |  |
| Generalisability | 21 | Generalisability (external validity, applicability) of the trial findings | Page 45-48 |
| Interpretation | 22 | Interpretation consistent with results, balancing benefits and harms, and considering other relevant evidence | Page 45-48 |
| Other information | | |  |
| Registration | 23 | Registration number and name of trial registry | Page 33  Attachment I |
| Protocol | 24 | Where the full trial protocol can be accessed, if available | Attachment I; REBEC (RBR-9qnm34y) |
| Funding | 25 | Sources of funding and other support (such as supply of drugs), role of funders |  |

*We strongly recommend reading this statement in conjunction with the CONSORT 2010 Explanation and Elaboration for important clarifications on all the items. If relevant, we also recommend reading CONSORT extensions for cluster randomised trials, non-inferiority and equivalence trials, non-pharmacological treatments, herbal interventions, and pragmatic trials. Additional extensions are forthcoming: for those and for up to date references relevant to this checklist, see [www.consort-statement.org](http://www.consort-statement.org).
